# Supplementary material for: Adult Low-Hypodiploid Acute Lymphoblastic Leukemia Emerges from Preleukemic TP53 -Mutant Clonal Hematopoiesis
Source: Oxford University Press journal article supplement (doi:10.1158/2643-3230.bcd-22-0154), 2023-01-10
Supplement: bcd-22-0154_supplementary_tables_s1-s11_suppst1-st11.xlsx [file bcd-22-0154_supplementary_tables_s1-s11_suppst1-st11.xlsx]

## Sheet: TableS1
Supplementary Table 1. Karyotypes of LH-ALL patients at diagnosis
Patient_ID	Karyotype
EI_002	64,XX,+X,+X,+1,+4,+5,+6,+8,+8,+10,+10,+11,+12,+18,+19,+20,+21,+21,+22[6]/46,XX[4]
EI_005	55~57,XX,+X,+1,+2,+6,+8,-9,i(9)(q10) or add(9)(p12),+10,+11,+11,+15,+19,+21[cp6]/46,XX[3]
EI_008	35,X,-Y,-2,-3,-4,-7,-9,-12,-13,-16,-17,-20[4]/46,XY[21]
EI_009	36,XX,-2,-3,-4,-7,-9,-12,-13,-16,-17,-20[8]/46,XX[2]
EI_016	failure
EI_024	59~62,XX,+X,+1,+2,+4,+5,+6,+8,+10,+11,+12,+14,+16,+17,+18,+21,+22,+22,+mar[cp16]/46,XX[5]
EI_025	failure
EI_026	failure
EI_028	37,XX,-3,-7,-8,-13,-15,-16,-17,-18,-20[4]/46,XX[14]
EI_031	36,X,-X,-,2,-3,-4,-7,-12,-13,-15,-16,-17, inc[13]/46,XX[1]
EI_032	67<3n>,XX,-X,+1,-3,-4,-5,+6,-7,-8,-9,+10,+11,-13,+14,-15,-16,-17,+18,+19,-20,+3mar[13]/67,sl,+21,-22[7]
EI_035	37,XX,-3,-4,-5,-7,-9[6],-13,-14[4],-16,-17,-18[3],-20,-21,+mar1,+mar2[7][cp10]/43~44,XX,?add(5)(q?),+?10[2],add(11)(p1?)[4],?i(11)(q10)[3],-13,-16,-17,-18,-19,-20,-20,?add(21)(p11)[5],+2~3mar[cp6]/46,XX[4]
EI_040	failure
EI_042	70~73<3n>,XXXX,+1,+2,-3[13],+6,-7,+8[20],-9,+10[10],+11[3],+12[7],-13,-15[17],-16[14], -17[16],-18[3],+19[5],-20[12],+21[8],+22[20],+1~3mar[14][cp22]
EI_046	38,X,-X,-3,-4,-7,-9,add(11)(p15),add(13)(q34),-16,-17,-18[5]/46,XX[5]
EI_047	33<n>,X,+1,+5,+6,+8,+10,+11,+18,+19,+21,+22[17]/46,XX[6]
EI_054	35<2n>,X,-Y,-2,-3,-4,-5,-7,-8,-9,-12,-13,-15,-16,-17,+1~2mar[cp3]/67~70<4n>,slx2,-X,-2,-5,-6,-8,-11,-14,-18,-21,+1~4mar[cp9]/46,XY[8]
EI_057	46,XX[21]
EI_073	46,XY[20]
EI_075	46,XX,t(4;12)(q26;q21)[9]/39,X,-X,-3,der(4)t(4;12)(q26;q21),-7,-8,-9,-10,add(11)(p14),-12,-16,+2~4mar[cp7]/46,XX[2]
EI_076	70<3n>,XX,+1[12],+3[2],der(5;22)(q10;q10)[8],+6[10],-7[12],-9[12],+10[9],+11[7],+12[7],+21[12],+21[12],-22[12],+mar[cp12]/46,XX[5]
EI_083	46,XX[20]
EI_084	35,XX,-3,-4,-5,-7,-8,-9,-13,-15,-16,-17,-20[15]/46,XX[5]
EI_088	38~39,XX,-3[19],del(5)(q31q3?3)[15],-7[19],-8[4],add(8)(p11)[3],del(9)(p13)[9],-10[4],add(10)(q22)[3],-13[19],-15[13],-16[19],-17[19],-19[19],add(19)(p13)[4],-20[11][cp12]/70~74<3n>,XXX,+X[3],+1[6],-3[6],+4[6],+6[4]-7[6],-7[5],add(8)[4],-9[5],+10[2],add(10)[4]+add(10)[3],+11[2],+12[5],-13[6],?+14[5],-15[5],-16[4],+18[6],-19[5],+21[4],+1~5mar[cp6]/46,XX
EI_089	39,XX,-3,-7,-13,-15,-16,-17,-18,-20,+mar[7]/68<3n>,XX,+X,+1,-3,+5,-7,+8,+11,-13,-15,-16,-17,-18,-18,-20,+21,+mar[5]/46,XX[7]
EI_090	66~67<3n>,inc[2]/46,XY[20]
EI_092	62,XX,+X,+X,+6,dup(8)(q21q24)x2,+10,+10,+11,+12,+12,+18,+18,+19,+19,+21,+21,+22,+22
EI_098	38,XY,-2,-3,-6,-7,-12,-15,-16,-17[5]/46,XY[15]
EI_100	66~72,<3n>,XY,+X[7],+Y[5],+1[8],+2[8],+2x2[2],-3[12],-4[10],-5[9],+6[3],-7[8],-9[6],+10[6], -10[4],+11[5],-11[4],-13[5],+14[2],-14[5],-15[8],-16[8],+17[2],+18[7],+19[5],-19[3],+20[3], -20[4],+21[4],+22[5],+22x2[8],+1~3mar[cp16]/46,XY[6]
EI_106	failure
EI_107	38,X,-X,-3,-7,-13,-14,-15,-16,-17[10]/74,idemx2[1]/46,XX[4]
EI_108	73,XXY,-3,-4,+6,-7,+8,-9,+10,+11,+13,-16,-17,+18,+19,+20,+22,+mar[3]/46,XY[10]
EI_109	60<3n>XX,-Y,-2,-3,-4,-5,+6,-7,+8,-9,-11,-12,-13,+14,-15,-16,-17,+19,-20,+22[2]/46,XY[14]
EI_110	35,X,-X,-2,-3,-7,-9,-13,-15,-16,-17,-20,-22[16]/35,sl,?add(4)(q2?)[4]/70,slx2[2]
EI_111	37,XY,-2,-3,-4,-7,-12,-13,-15,-16,-17[1]/59<3n>,XXY,-2,-3,-4,+5,+6,-7,-10,-12,-13,-13,-14,-15,-16,-17[4]/61~64<3n>,XXY,+Y,+1,-2,-3,-4,+6,-7,+9,-12,-13,-14,-15,-16,-17,+19,+22[cp10]/46,XY[3]
EI_112	62~64,XXYY,+1,+1,der(1)del(1)(p13.3p12)del(1)(q21.1q44)x2,+2,+6,+6,+8,del(9)(p21.3),der(?9)t(?9;11)(qter;q22.3),+10,+10,+11,+11,+12,+13,+14,-17[3],+18,+19,+21,+22,+22[17]/46,XY[3]
EI_115	71~74<3n>,XXX,+X,+1,-3,+5,+6,-7,+8,-9,+11,-13,-14,-15,-16,-17,+18,+19,+21,+22[cp5]/46,XX[2]
EI_124	67,XX,+X,+Y,+1,+1,+4,+5,+5,+6,+8,+8,+10,+11,+11,+14,+18,+18,+19,+19,+21,+21,+22[8]/46,XY[9]
EI_126	36,XY,-2,-3,-4,-7,-10,-12,-13,-14,-15,-17[4]/46,XY[16]
EI_133	46,XY[20]
EI_135	39~42,X,-X,-3,-5,-15,-16,-17,-21[cp6]/46,XX[20]
G14_006	39,XY,-3,-4,-7,-12,-13,-16,-17[17]/78,idemx2[5]
G14_019	36,XX,-4,-5,-7,-8,-9,-13,-15,-16,-17,-20[9]/ 59~61,XX,+1,+1,+2,+2,+2,+4,+6,-7,+8,+8,+10,+11,+12,+12,+14,-15,+16,+19,+19,+21,+21,+22,+1~3mar[cp9]/46,XX[2]
G14_021	66~68<3n>,XX,+X,+X,-3,+4,-5,+6,?del(7)(q22q36),+?del(7),+8,-9,add(9)(p2?1)x2,+10,+12,-13,-15,-16,-17,+18,+18,-20,+21,+22,+mar[cp15]/46,XX[6]
G14_099	63,XXYY,+1,+2,+6,+6,+8,+8,+10,+11,+11,+12,der(13;13)(q10;q10),+14,+18,+19,+19,+20,+21,+21[cp12]
G14_134	95~97<4n>,XXYY,+1,-3,+4,+6,-7,+8,-9,+11,+18,+21,+22[cp11]
G14_138	33,XY,-2,-3,-5,-7,-8,-9,-10,-12,-13,-14,-15,?add(16)(q1?),-17,-19[5]/46,XY[15]
G14_182	71,XXX,+add(X)(p22)[3],+1[7],+2[4],-3,+4[8],+5[3],+6[7],-7,-8[7],-9,+10[3],+11,-12,-13,-15,-16,-17,+18[4],+21,-22,i(22)(q10)[3],i(22)(q10),+2~8mar[cp13]/46,XX[5]
G14_196	38<2n>,+X,-Y,-2,-3,-7,-12,-15,-16-,17(8]/65~69<3n>,XX,-Y,-2,-3,+5,-7,+8,-12,+13,+14,-15,-16,-17,+19,+20,+21,+22[cp11]/46,XY[1]
G14_198	46,XY[26]
G14_206	38,X,-Y,t(2;8;9)(p13;p21;p22),-3,del(5)(q13q31),-7,del(13)(q14q32),-15,-16,-17,-19,-20[16]/46,XY[6]
G14_215	failure
G14_232	67~69<4n>,XYY,-X,-2,-2,-3,-3,-4,-4,-6,-7,-7,-9,-?9,-?10,-12,-12,-13,-13,-14,-15,-15,-16,-16,-17,-17,-?18,-20,-20,-21,-?22[cp6]/46,XY[19/25]
G14_249	68~74,XXYY,+1,+1,+5,+5,+6,+8,+8,+9,+10,+10,+11,+11,+14,+14,+17,+18,+,18,+19,+19,+20,+20,+21,+21,+22,+22,+1~2mar[cp11]/46,XY[19]
G14_286	46,XX[20]
G14_320	46,XY[20]
G14_344	46,XX[21]
G14_356	62~67,XY,+X,+Y,+1,+1,+5,+6,+6,+8,+8,+10,+11,+14,+18,+18,+19,+20,+21,+21,+22,+22[cp14]
G14_362	76<3n>,XX,+1,-3,+4,+5,+6,-7,-8,-9,+11,-12,+13,14,+15,+16,+18,+18,+19,+20,+21,+22[7]/46,XX[7]
G14_367	71<3n>,XXY,+Y,+1,-2,-3,-4,+5,+6,-7,-7,+8,+10,+11,-12,-13,-16,-17,-18,+19,+20,+21,+22[5]/72,sl,-13,+mar,+mar[4]/46,XY[60
G14_400	63<3n>,XX,-X,-3,-4,-5,+6,-7,+8,-9,-13,der(14)t(11;14)(q1?3;p11)x2,-15,-16,-17,+18,+19,-20,+21,+mar[cp7]/46,XX[13]
G14_426	46,XY[24]
G14_431	46,XY[28]
G14_443	37,XY,-2,-3,-4,-7,-12,-13,-15,-16,-17[6]/68-71<3n>,XXY,inc[cp3]/46,XY[8]
G14_473	35,XY,-2,-3,-4,-7,-12,-13,-14,-16,-17,-20,-22[5]/65,slx2[2]/46,XY[2]
G14_482	failure
G14_487	37,XX,-3,-4,-5,-7,-9,der(10)?t(10;11)(p11;q11),-15,-16,-17,-20[cp11]/63~74,idemx2[cp10]/46,XX[3]
G14_530	60~62<2n>,XX,+1,+2,+5,+5,+6,+10,+11,+11,+12,?der(15;22)(q10;q10),+17,+18,+19,+19,+21,+22[cp2]/46,XX[18]
G14_534	46,XY[20]
G14_593	46,XX[12]
G14_612	39,XY,dup(2)(q11.2q22-24),-3,-4,-5,-7,idic(8)(p11.2),add(10)(q26), add(11)(q23),-15,-16,-17,?add(18)(q22)[7]/46,XY[3]
G14_616	68<3n>,XXY,+Y,+1,-2,-3,-4,+6,-7,del(7)(p?),+8,-12,-13,-15,-16,add(16)(p13),-17,+18,+19,-20,+21,+22, +mar1[10]/69,sl,+mar2[10]/69,sl,+11,+16,-mar1,-mar2,+mar3[3]/46,XY[1]
G14_629	69<3n>,XXY,+X,+Y,+1,-2,-3,-4,+6,-7,+8,-9,+11,-12,-13,+14,-15,-16,-17,+18,+21,+22[1]/46,XY[20]
G14_651	failure
G14_652	65~66,XY,+X,+Y,+1,+1,+2,del(3)(q2?4)[2],+3,add(7)(p15)[3],+10,del(11)(q23),+11,+18 ,+18,del(20)(p13),+20,+21,+21,+1~3mar[cp5]/46,XY[11]
G14_745	failure
G14_749	35,X,-Y,-2,-3,-4,-7,-9,-12,-13,-16,-17,-20[10]/46,XY[20]
G14_759	36,X,-X[5],-3,-7,-13,-15,-16,-17,-18,-20,-21,-22[3],+mar[cp8]/36,sl,add(11)(p15)[4]/46,XX[8]
G14_760	failure

## Sheet: TableS2
Supplementary Table 2. Somatic variants detected in LH-ALL patients at diagnosis
Patient_ID	Gene	Chromosome	Position_start_hg19	Transcript	Exon_position	DNA_variation	Protein_variation	VAF (%)
EI_002	DNMT3A	chr2	25463248	NM_175629	exon19	c.C2245T	p.R749C	42.8
EI_002	MLLT3	chr9	20456705	NM_004529	exon3	c.272delA	p.N91fs	19.3
EI_002	NF1	chr17	29422340	NM_000267	exon1	c.14dupG	p.R5fs	92.8
EI_002	TP53	chr17	7577129	NM_000546	exon8	c.T809C	p.F270S	90.2
EI_005	FLT3	chr13	28592629	NM_004119	exon20	c.A2516C	p.D839A	6.35
EI_005	FLT3	chr13	28592609	NM_004119	exon20	c.G2536A	p.G846S	15.8
EI_005	FLT3	chr13	28608350	NM_004119	exon14	c.A1706T	p.Q569L	4.73
EI_005	FLT3	chr13	28608466	NM_004119	exon13	c.C1676A	p.T559N	2.78
EI_005	IKZF1	chr7	50455105	NM_006060	exon6	c.G652T	p.E218X	91.4
EI_005	TP53	chr17	7577123	NM_000546	exon8	c.814_815insGACGGAACAGCTTTGAGG	p.V272delinsGRNSFEV	39.8
EI_008	CACNA1E	chr1	181705570	NM_001205293	exon22	c.C3422T	p.P1141L	6.9
EI_008	TP53	chr17	7577120	NM_000546	exon8	c.G818A	p.R273H	91.8
EI_009	TET2	chr4	106157019	NM_001127208	exon3	c.1921delG	p.G641fs	75.3
EI_009	TP53	chr17	7577580	NM_000546	exon7	c.A701G	p.Y234C	63.8
EI_016	FAT4	chr4	126329626	NM_024582	exon4	c.C5597T	p.T1866M	7.44
EI_016	RB1	chr13	48878082	NM_000321	exon1	c.35_69del	p.T12fs	33.9
EI_016	TP53	chr17	7578406	NM_000546	exon5	c.G524A	p.R175H	32.9
EI_024	ANKRD11	chr16	89349721	NM_001256182	exon10	c.3228delG	p.R1076fs	31.1
EI_024	CDKN2A	chr9	21970971	NM_000077	exon2	c.C387A	p.Y129X	73.1
EI_024	FLT3	chr13	28592629	NM_004119	exon20	c.A2516G	p.D839G	7.08
EI_024	FLT3	chr13	28608323	NM_004119	exon14	c.T1733C	p.M578T	10.3
EI_024	NRAS	chr1	115258748	NM_002524	exon2	c.G34A	p.G12S	3.54
EI_024	NRAS	chr1	115256529	NM_002524	exon3	c.A182C	p.Q61P	3.31
EI_024	TP53	chr17	7578490	NM_000546	exon5	c.T440A	p.V147D	77.8
EI_025	TP53	chr17	7578496	NM_000546	exon5	c.T434A	p.L145Q	16.6
EI_026	EP300	chr22	41574678	NM_001429	exon31	c.6964delC	p.P2322fs	9.76
EI_026	FAT1	chr4	187539446	NM_005245	exon10	c.G8294T	p.S2765I	6.98
EI_026	SETD2	chr3	47158131	NM_014159	exon4	c.G4568T	p.R1523L	7.15
EI_026	TP53	chr17	7578413	NM_000546	exon5	c.G517T	p.V173L	6.58
EI_028	TP53	chr17	7578413	NM_000546	exon5	c.G517A	p.V173M	60.2
EI_031	TP53	chr17	7578393	NM_000546	exon5	c.T537G	p.H179Q	14.7
EI_032	TP53	chr17	7577121	NM_000546	exon8	c.C817G	p.R273G	68.4
EI_035	DNMT3A	chr2	25463239	NM_175629	exon19	c.T2254G	p.F752V	45.2
EI_035	TP53	chr17	7577568	NM_000546	exon7	c.G713A	p.C238Y	86.7
EI_040	TP53	chr17	7577120	NM_000546	exon8	c.G818A	p.R273H	48.8
EI_042	BIRC6	chr2	32832607	NM_016252	exon72	c.G14156A	p.S4719N	41.2
EI_042	NF1	chr17	29663763	NM_000267	exon7	c.6259_6261delinsCCCT	p.M2087fs	60
EI_042	RB1	chr13	49027168	NM_000321	exon18	c.C1735T	p.R579X	2.98
EI_042	TP53	chr17	7577568	NM_000546	exon7	c.G713A	p.C238Y	68
EI_046	JAK2	chr9	5073770	NM_004972	exon14	c.G1849T	p.V617F	7.4
EI_046	KMT2D	chr12	49445784	NM_003482	exon10	c.T1682A	p.L561X	3.07
EI_046	TP53	chr17	7577538	NM_000546	exon7	c.G743A	p.R248Q	41.4
EI_047	TET2	chr4	106156935	NM_001127208	exon3	c.1837dupG	p.P612fs	48.3
EI_047	TP53	chr17	7578406	NM_000546	exon5	c.G524A	p.R175H	77.1
EI_054	CDKN2B	chr9	22008802	NM_004936	exon1	c.149_150del	p.A50fs	59.1
EI_054	TET2	chr4	106155956	NM_001127208	exon3	c.858delA	p.P286fs	63.3
EI_054	TP53	chr17	7577548	NM_000546	exon7	c.G733A	p.G245S	73.9
EI_057	TP53	chr17	7578503	NM_000546	exon5	c.G427A	p.V143M	8.38
EI_073	PTPN2	chr18	12859168	NM_002828	exon2	c.G155C	p.S52T	31.9
EI_073	SLX4IP	chr20	10579386	NM_001009608	exon5	c.303_304del	p.S101fs	18.8
EI_073	TP53	chr17	7578404	NM_000546	exon5	c.T526A	p.C176S	52.6
EI_075	TET2	chr4	106157296	NM_001127208	exon3	c.2198delC	p.S733fs	62.3
EI_075	TP53	chr17	7578556	NM_000546	intron4	c.376-2A>G	.	33.1
EI_075	TP53	chr17	7578555	NM_000546	intron4	c.376-1G>A	.	33.2
EI_076	CDKN2A	chr9	21971130	NM_000077	exon2	c.227_228insA	p.A76fs	63.7
EI_076	NF1	chr17	29486092	NM_000267	exon3	c.T269C	p.L90P	64.2
EI_076	TP53	chr17	7578403	NM_000546	exon5	c.G527A	p.C176Y	66.9
EI_079	TP53	chr17	7577538	NM_000546	exon7	c.G743A	p.R248Q	13.1
EI_083	RB1	chr13	48955512	NM_000321	exon17	c.1629delA	p.T543fs	13.7
EI_083	TP53	chr17	7578203	NM_000546	exon6	c.G646A	p.V216M	71.8
EI_084	NF1	chr17	29670124	NM_000267	exon48	c.A7160T	p.N2387I	23.5
EI_084	NF1	chr17	29560074	NM_000267	exon27	c.3552dupA	p.T1184fs	6.76
EI_084	TP53	chr17	7577120	NM_000546	exon8	c.G818A	p.R273H	64.6
EI_088	KMT2D	chr12	49445782	NM_003482	exon10	c.1683delG	p.L561fs	4.37
EI_088	TP53	chr17	7578400	NM_000546	exon5	c.C530G	p.P177R	65.2
EI_089	ARID2	chr12	46205217	NM_152641	exon4	c.G301C	p.E101Q	29.8
EI_089	TP53	chr17	7577538	NM_000546	exon7	c.G743A	p.R248Q	41.9
EI_092	TP53	chr17	7578402	NM_000546	exon5	c.C528A	p.C176X	91.4
EI_098	TET2	chr4	106196670	NM_001127208	exon11	c.5004dupT	p.S1668fs	81.5
EI_098	TP53	chr17	7579373	NM_000546	exon4	c.G314T	p.G105V	53.5
EI_098	ZFP36L2	chr2	43452639	NM_006887	exon2	c.303_304insCTTTCCTC	p.K102fs	8.59
EI_100	TP53	chr17	7577498	NM_000546	intron7	c.782+1G>A	.	68.7
EI_106	TP53	chr17	7578406	NM_000546	exon5	c.G524A	p.R175H	15.4
EI_107	DNMT3A	chr2	25457242	NM_175629	exon23	c.G2645C	p.R882P	35.4
EI_107	EZH2	chr7	148508734	NM_004456	exon16	c.T1930A	p.S644T	39.5
EI_107	NF1	chr17	29665041	NM_000267	intron44	c.6705-2A>G	.	6.98
EI_107	NF1	chr17	29664601	NM_000267	intron43	c.6642+1G>T	.	44.3
EI_107	NF1	chr17	29556097	NM_000267	exon21	c.G2464T	p.G822X	14.9
EI_107	TP53	chr17	7578526	NM_000546	exon5	c.G404A	p.C135Y	63.6
EI_108	TP53	chr17	7577566	NM_000546	exon7	c.A715G	p.N239D	30
EI_109	NF1	chr17	29663720	NM_000267	exon42	c.A6215T	p.H2072L	6.9
EI_109	NF1	chr17	29527607	NM_000267	exon9	c.1057delC	p.L353fs	56.3
EI_109	TP53	chr17	7577111	NM_000546	exon8	c.C827A	p.A276D	80.3
EI_110	NF1	chr17	29557336	NM_000267	exon23	c.C3049T	p.Q1017X	4.36
EI_110	TP53	chr17	7578263	NM_000546	exon6	c.C586T	p.R196X	6.11
EI_111	TP53	chr17	7577539	NM_000546	exon7	c.C742T	p.R248W	90.4
EI_112	FLT3	chr13	28592642	NM_004119	exon20	c.G2503T	p.D835Y	3.33
EI_112	KMT2D	chr12	49444726	NM_003482	exon10	c.G2740T	p.E914X	41.9
EI_112	MEF2C	chr5	88047676	NM_001193347	exon7	c.C641G	p.T214R	84.3
EI_112	NF1	chr17	29576097	NM_000267	exon30	c.4071delC	p.F1357fs	34.3
EI_112	TP53	chr17	7577539	NM_000546	exon7	c.C742T	p.R248W	87
EI_115	TP53	chr17	7577547	NM_000546	exon7	c.G734A	p.G245D	5.17
EI_124	NF1	chr17	29665757	NM_000267	exon46	c.6856dupA	p.Y2285fs	33.4
EI_124	TP53	chr17	7578208	NM_000546	exon6	c.A641G	p.H214R	43.2
EI_126	CREBBP	chr16	3807877	NM_004380	exon18	c.T3542C	p.L1181P	7.77
EI_126	DOT1L	chr19	2226776	NM_032482	exon27	c.A4256T	p.D1419V	54.4
EI_126	TP53	chr17	7578479	NM_000546	exon5	c.C451T	p.P151S	70.5
EI_126	ZFP36L2	chr2	43452244	NM_006887	exon2	c.698dupT	p.L233fs	48.7
EI_133	DNMT3A	chr2	25467504	NM_175629	exon14	c.T1572A	p.C524X	42.8
EI_133	TP53	chr17	7578176	NM_000546	intron6	c.672+1G>A	.	26.9
EI_135	TP53	chr17	7579504	NM_000546	exon4	c.182delA	p.D61fs	36.8
G14_006	TP53	chr17	7578190	NM_000546	exon6	c.A659G	p.Y220C	83.9
G14_019	ATRX	chrX	76949319	NM_000489	exon6	c.477dupA	p.R160fs	20.2
G14_019	NF1	chr17	29654596	NM_000267	exon38	c.5349dupT	p.Y1783fs	56.7
G14_019	TET2	chr4	106197477	NM_001127208	exon11	c.5811delA	p.P1937fs	22.6
G14_019	TP53	chr17	7577548	NM_000546	exon7	c.733_734delinsTT	p.G245F	60
G14_021	ASXL3	chr18	31318662	NM_030632	exon11	c.G1294A	p.D432N	18.2
G14_021	CD36	chr7	80302678	NM_001001548	exon13	c.1207_1208insAGAATCTGAAGAGGAACTATATT	p.K403fs	6.55
G14_021	FLT3	chr13	28592642	NM_004119	exon20	c.G2503C	p.D835H	4.81
G14_021	TP53	chr17	7578440	NM_000546	exon5	c.A490G	p.K164E	77.6
G14_099	TP53	chr17	7578203	NM_000546	exon6	c.G646A	p.V216M	86.7
G14_134	ATF7IP	chr12	14577070	NM_181352	exon2	c.T245G	p.I82S	7.64
G14_134	NRAS	chr1	115256528	NM_002524	exon3	c.A183C	p.Q61H	16.4
G14_134	RAG1	chr11	36594938	NM_000448	exon2	c.G84T	p.W28C	13.2
G14_134	TP53	chr17	7579361	NM_000546	exon4	c.T326C	p.F109S	79.3
G14_138	TP53	chr17	7577534	NM_000546	exon7	c.G747T	p.R249S	18.7
G14_182	TP53	chr17	7578208	NM_000546	exon6	c.A641G	p.H214R	67.2
G14_196	CDKN1B	chr12	12871013	NM_004064	exon1	c.241delA	p.K81fs	25.1
G14_196	TP53	chr17	7577538	NM_000546	exon7	c.G743A	p.R248Q	29.4
G14_198	TP53	chr17	7578534	NM_000546	exon5	c.393_395del	p.131_132del	77.6
G14_206	FLT3	chr13	28608279	NM_004119	exon14	c.G1777C	p.D593H	37.9
G14_206	TP53	chr17	7577082	NM_000546	exon8	c.G856A	p.E286K	81.1
G14_215	TP53	chr17	7578541	NM_000546	exon5	c.T389A	p.L130H	40.3
G14_232	RB1	chr13	48955400	NM_000321	exon17	c.1517dupT	p.L506fs	35.7
G14_232	TP53	chr17	7577520	NM_000546	exon7	c.T761G	p.I254S	27.4
G14_249	TP53	chr17	7577539	NM_000546	exon7	c.C742T	p.R248W	60.3
G14_286	NRAS	chr1	115258747	NM_002524	exon2	c.G35C	p.G12A	34.4
G14_286	TP53	chr17	7577121	NM_000546	exon8	c.C817T	p.R273C	89.1
G14_320	TP53	chr17	7578554	NM_000546	exon5	c.T376G	p.Y126D	48.2
G14_344	EZH2	chr7	148506226	NM_004456	exon19	c.A2132G	p.H711R	17.7
G14_344	NF1	chr17	29508440	NM_000267	exon6	c.587_588insAACG	p.E196fs	10.6
G14_344	TP53	chr17	7578392	NM_000546	exon5	c.G538A	p.E180K	54.3
G14_356	RB1	chr13	49030478	NM_000321	exon19	c.1954dupA	p.Y651fs	51.3
G14_356	TP53	chr17	7578263	NM_000546	exon6	c.C586T	p.R196X	61.7
G14_362	NF1	chr17	29497016	NM_000267	intron5	c.586+1G>T		41.6
G14_362	PAN3	chr13	28748528	NM_175854	exon2	c.C550T	p.Q184X	33.7
G14_362	TP53	chr17	7578400	NM_000546	exon5	c.C530G	p.P177R	67.5
G14_367	RB1	chr13	48878074	NM_000321	exon1	c.26_27insTT	p.T9fs	36.1
G14_367	TP53	chr17	7577586	NM_000546	exon7	c.T695A	p.I232N	41.2
G14_400	FLT3	chr13	28592642	NM_004119	exon20	c.G2503T	p.D835Y	3.71
G14_400	TP53	chr17	7577498	NM_000546	intron7	c.782+1G>A	.	59.7
G14_426	DNMT3A	chr2	25467405	NM_175629	exon14	c.1659_1667del	p.553_556del	31.9
G14_426	TP53	chr17	7579485	NM_000546	exon4	c.G202T	p.E68X	67.1
G14_443	ASXL1	chr20	31022441	NM_015338	exon12	c.1927dupG	p.G642fs	2.86
G14_443	PAX5	chr9	36882049	NM_016734	exon8	c.963dupC	p.A322fs	20.9
G14_443	RB1	chr13	49030478	NM_000321	exon19	c.1954dupA	p.Y651fs	7.5
G14_443	TP53	chr17	7577120	NM_000546	exon8	c.G818A	p.R273H	78.9
G14_473	DNMT3A	chr2	25464451	NM_175629	exon17	c.C2062T	p.R688C	2.61
G14_473	TP53	chr17	7577568	NM_000546	exon7	c.G713A	p.C238Y	29.7
G14_482	NRXN1	chr2	51255060	NM_001135659	exon2	c.351delG	p.V117fs	14.8
G14_482	TP53	chr17	7577539	NM_000546	exon7	c.C742T	p.R248W	40
G14_487	NF1	chr17	29553477	NM_000267	exon18	c.2027dupC	p.T676fs	22.3
G14_487	TP53	chr17	7578394	NM_000546	exon5	c.A536C	p.H179P	52.1
G14_530	TP53	chr17	7577120	NM_000546	exon8	c.G818A	p.R273H	54.7
G14_534	TP53	chr17	7578406	NM_000546	exon5	c.G524A	p.R175H	18.5
G14_593	TP53	chr17	7577120	NM_000546	exon8	c.G818A	p.R273H	43.5
G14_612	TP53	chr17	7578406	NM_000546	exon5	c.G524A	p.R175H	27.7
G14_616	TP53	chr17	7577081	NM_000546	exon5	c.528_857GTAGGACAAAACACCA	p.C176fs	10.8
G14_629	DNMT3A	chr2	25457242	NM_175629	exon23	c.G2645A	p.R882H	17.6
G14_629	TP53	chr17	7578281	NM_000546	exon6	c.C568A	p.P190T	14.4
G14_651	TP53	chr17	7578203	NM_000546	exon6	c.G646A	p.V216M	72.8
G14_652	TP53	chr17	7578406	NM_000546	exon5	c.G524A	p.R175H	73
G14_745	EZH2	chr7	148506429	NM_004456	exon18	c.T2083A	p.S695T	52.8
G14_745	NF1	chr17	29527558	NM_000267	exon9	c.G1007A	p.W336X	15.5
G14_745	TP53	chr17	7577124	NM_000546	exon8	c.G814A	p.V272M	55.6
G14_749	TP53	chr17	7577548	NM_000546	exon7	c.G733A	p.G245S	26.8
G14_759	ATM	chr11	108160488	NM_000051	exon29	c.C4396T	p.R1466X	32.3
G14_759	CREBBP	chr16	3781375	NM_004380	exon30	c.C4990T	p.R1664C	33.6
G14_759	DNMT3A	chr2	25457243	NM_175629	exon23	c.C2644T	p.R882C	33.7
G14_759	TET2	chr4	106164913	NM_001127208	exon6	c.C3781T	p.R1261C	36.5
G14_759	TP53	chr17	7577120	NM_000546	exon8	c.G818A	p.R273H	57.4
G14_760	TP53	chr17	7578406	NM_000546	exon5	c.G524A	p.R175H	58

## Sheet: TableS3
Supplementary Table 3. ARCH related variants detected in LH-ALL patients at remission
*The somatic status of TP53 mutations was assessed by Sanger sequencing of sorted T cells (EI_047 and G14_286) or non-infiltrated PBMC at diagnosis (EI_035)
Patient_ID	Gene	Chromosome	Position_start_hg19	Transcript	Exon_position	DNA_variation	Protein_variation	VAF (%)	TP53_somatic_confirmation
EI_002	TET2	chr4	106158496	NM_001127208	exon3	c.3398dupG	p.C1133fs	36.3	NA
EI_002	DNMT3A	chr2	25463248	NM_175629	exon19	c.C2245T	p.R749C	31.8	NA
EI_008	DNMT3A	chr2	25457176	NM_175629	exon23	c.C2711A	p.P904Q	3.17	NA
EI_009	TET2	chr4	106157019	NM_001127208	exon3	c.1921delG	p.G641fs	19	NA
EI_009	TP53	chr17	7577580	NM_000546	exon7	c.A701G	p.Y234C	16.5	NA
EI_031	TP53	chr17	7578393	NM_000546	exon5	c.T537G	p.H179Q	14.8	NA
EI_035	DNMT3A	chr2	25463239	NM_175629	exon19	c.T2254G	p.F752V	42.3	NA
EI_035	TP53	chr17	7577568	NM_000546	exon7	c.G713A	p.C238Y	46.1	Yes*
EI_046	JAK2	chr9	5073770	NM_004972	exon14	c.G1849T	p.V617F	28	NA
EI_046	TP53	chr17	7577538	NM_000546	exon7	c.G743A	p.R248Q	21	NA
EI_047	TP53	chr17	7578406	NM_000546	exon5	c.G524A	p.R175H	31.8	NA
EI_075	TET2	chr4	106157296	NM_001127208	exon3	c.2198delC	p.S733fs	32.6	NA
EI_075	TP53	chr17	7578556	NM_000546	intron4	c.376-2A>G	.	37.8	NA
EI_075	TP53	chr17	7578555	NM_000546	intron4	c.376-1G>A	.	33.1	NA
EI_076	TP53	chr17	7578403	NM_000546	exon5	c.G527A	p.C176Y	3.7	NA
EI_098	TET2	chr4	106196670	NM_001127208	exon11	c.5004dupT	p.S1668fs	46.3	NA
EI_098	TP53	chr17	7579373	NM_000546	exon4	c.G314T	p.G105V	5.88	NA
EI_106	TP53	chr17	7578406	NM_000546	exon5	c.G524A	p.R175H	3.37	NA
EI_107	DNMT3A	chr2	25457242	NM_175629	exon23	c.G2645C	p.R882P	10.7	NA
EI_107	TP53	chr17	7578526	NM_000546	exon5	c.G404A	p.C135Y	7.09	NA
EI_112	TP53	chr17	7577539	NM_000546	exon7	c.C742T	p.R248W	10.9	NA
EI_115	TET2	chr4	106193967	NM_001127208	exon10	c.G4429T	p.E1477X	4.88	NA
EI_126	TP53	chr17	7578479	NM_000546	exon5	c.C451T	p.P151S	6.54	NA
EI_133	DNMT3A	chr2	25467504	NM_175629	exon14	c.T1572A	p.C524X	19.9	NA
G14_019	TP53	chr17	7577547	NM_000546	exon7	c.733_734delinsTT	p.G245F	4	NA
G14_021	TP53	chr17	7578440	NM_000546	exon5	c.A490G	p.K164E	38.8	NA
G14_138	TP53	chr17	7577534	NM_000546	exon7	c.G747T	p.R249S	4.13	NA
G14_232	TP53	chr17	7577520	NM_000546	exon7	c.T761G	p.I254S	8.3	NA
G14_286	TP53	chr17	7577121	NM_000546	exon8	c.C817T	p.R273C	51.2	No*
G14_344	TP53	chr17	7578392	NM_000546	exon5	c.G538A	p.E180K	51.1	Not evaluable
G14_426	TP53	chr17	7579485	NM_000546	exon4	c.G202T	p.E68X	41.9	Yes*
G14_426	DNMT3A	chr2	25467405	NM_175629	exon14	c.1659_1667del	p.553_556del	35.4	NA
G14_473	DNMT3A	chr2	25464451	NM_175629	exon17	c.C2062T	p.R688C	7.27	NA
G14_534	TP53	chr17	7578406	NM_000546	exon5	c.G524A	p.R175H	2.56	NA
G14_593	TP53	chr17	7577120	NM_000546	exon8	c.G818A	p.R273H	3.08	NA
G14_629	TP53	chr17	7578281	NM_000546	exon6	c.C568A	p.P190T	25.3	NA
G14_629	DNMT3A	chr2	25457242	NM_175629	exon23	c.G2645A	p.R882H	24.9	NA
G14_749	TP53	chr17	7577548	NM_000546	exon7	c.G733A	p.G245S	9.62	NA
G14_759	TP53	chr17	7577120	NM_000546	exon8	c.G818A	p.R273H	20	NA
G14_759	TET2	chr4	106164913	NM_001127208	exon6	c.C3781T	p.R1261C	28.9	NA
G14_759	DNMT3A	chr2	25457243	NM_175629	exon23	c.C2644T	p.R882C	21.8	NA
G14_760	TP53	chr17	7578406	NM_000546	exon5	c.G524A	p.R175H	49.7	Not evaluable

## Sheet: TableS4
Supplementary Table 4. Minimal residual disease values of remission samples used for mutation analysis
Patient_ID	MRD_detection	MRD_value (%)	Comment
EI_002	ND	.	morphologic_remission
EI_005	ND	.	morphologic_remission
EI_008	positive	below quantitative range	.
EI_009	ND	.	morphologic_remission
EI_016	negative	.	.
EI_024	negative	.	.
EI_025	negative	.	.
EI_026	positive	4	.
EI_028	negative	.	.
EI_031	negative	.	.
EI_032	negative	.	.
EI_035	positive	0.1	.
EI_042	negative	.	.
EI_046	negative	.	.
EI_047	negative	.	.
EI_057	negative	.	.
EI_073	positive	below quantitative range	.
EI_075	positive	0.03	.
EI_076	positive	0.8	.
EI_079	ND	.	morphologic_remission
EI_083	positive	below quantitative range	.
EI_084	positive	1	.
EI_088	positive	0.7	.
EI_089	negative	.	.
EI_092	positive	0.04	.
EI_098	ND	.	morphologic_remission
EI_100	positive	0.7	.
EI_106	negative	.	.
EI_107	negative	.	.
EI_108	positive	0.03	.
EI_109	ND	.	morphologic_remission
EI_110	negative	.	.
EI_112	positive	0.02	.
EI_115	positive	below quantitative range	.
EI_124	negative	.	.
EI_126	negative	.	.
EI_133	ND	.	peripheral_blood_without_circulating_blasts
EI_135	negative	.	.
G14_006	negative	.	.
G14_019	negative	.	.
G14_021	ND	.	morphologic_remission
G14_099	negative	.	.
G14_134	positive	below quantitative range	.
G14_138	positive	below quantitative range	.
G14_182	positive	below quantitative range	.
G14_198	negative	.	.
G14_206	positive	below quantitative range	.
G14_215	positive	0.02	.
G14_232	negative	.	.
G14_249	positive	below quantitative range	.
G14_286	positive	0.3	.
G14_320	positive	below quantitative range	.
G14_344	positive	0.07	.
G14_356	negative	.	.
G14_362	negative	.	.
G14_367	negative	.	.
G14_400	positive	0.1	.
G14_426	negative	.	.
G14_443	positive	0.02	.
G14_473	positive	below quantitative range	.
G14_482	positive	0.3	.
G14_530	positive	below quantitative range	.
G14_534	positive	0.08	.
G14_593	negative	.	.
G14_612	negative	.	.
G14_616	negative	.	.
G14_629	positive	0.007	.
G14_651	ND	.	peripheral_blood_without_circulating_blasts
G14_652	negative	.	.
G14_745	positive	below quantitative range	.
G14_749	positive	0.02	.
G14_759	ND	.	morphologic_remission
G14_760	negative	.	.

## Sheet: TableS5
Supplementary Table 5. Somatic alterations in cell populations from diagnostic samples (BMMC) based on single-cell analyses
Patient_ID	Cell type	Cell count	IGK positive cells (%)	TP53 wt (%)	TP53 het (%)	TP53 hom (%)	TP53 missing genotype (%)
EI_047	B-lymphoblasts	3499	95.6%	0.008	0.03	0.929	0.033
EI_047	erythroid cells	168	10.1%	0.202	0.72	0.077	0
EI_047	NK cells	61	6.6%	0.23	0.672	0.082	0.016
EI_047	T-cells	241	13.3%	0.854	0.137	0.008	0
Patient_ID	Cell type	Cell count	TRD positive cells (%)	TP53 wt (%)	TP53 het (%)	TP53 hom (%)	TP53 missing genotype (%)
EI_035	B-lymphoblasts	3646	97.2%	0.007	0.005	0.957	0.031
EI_035	erythroid cells	64	3.1%	0.109	0	0.891	0
EI_035	myeloid cells	111	17.1%	0.09	0.009	0.891	0.009
EI_035	T-cells CD4+	254	14.1%	0.846	0.149	0.004	0
EI_035	T-cells CD8+	83	10.8%	0.892	0.096	0.012	0

## Sheet: TableS6
Supplementary Table 6. Somatic alterations in FACS-sorted cell populations from diagnostic samples
Patient_ID	Sample type	Cell type	Immunophenotype	Cell count	IGK MRD (ddPCR)	TP53 genotype (Sanger)
EI_047	PBMC	Mature B-cells	CD45high/CD19+/CD10-	88978	0.0016	heterozygous
EI_047	PBMC	Monocytes	CD45high/CD14+	9761	0.0015	heterozygous
EI_047	PBMC	T-cells	CD45high/CD3+	108854	0.0008	wildtype
Patient_ID	Sample type	Cell type	Immunophenotype	Cell count	TRD MRD (ddPCR)	TP53 VAF (NGS)	DNMT3A VAF (NGS)
EI_035	BMMC	B-lymphoblasts	CD45low/CD19+/CD34+/CD10-/CD20-	144560	0.887	1	0.52
EI_035	BMMC	Mature B-cells	CD45high/CD19+/CD34-/CD10-/CD20+	3515	0.022	0	0.22
EI_035	BMMC	Erythroid cells	CD45-/CD235a+	4798	0.033	0.86	0.45
EI_035	BMMC	NK-cells	CD45high/CD16+orCD56+	2946	0.026	0	0.24
EI_035	BMMC	CD4+ T-cells	CD45high/CD4+	34292	0.005	0.04	0.28

## Sheet: TableS7
Supplementary Table 7. Panel of genes for targeted sequencing
panel_V1	panel_V2
ABL1	ABL1
ABL2	.
ADARB2	ADARB2
ADD3	ADD3
ANK3	ANK3
ANKRD11	ANKRD11
ARHGAP24	ARHGAP24
ARID1A	ARID1A
ARID1B	ARID1B
ARID2	ARID2
ARID5B	ARID5B
ARMC2	ARMC2
ARPP21	ARPP21
ASXL1	ASXL1
ASXL2	ASXL2
ASXL3	ASXL3
ATF7IP	ATF7IP
ATM	ATM
ATP10A	ATP10A
ATP5O	ATP5O
ATRX	ATRX
AUTS2	AUTS2
BACH2	BACH2
BCOR	BCOR
BIRC6	BIRC6
BLK	BLK
BLNK	BLNK
BRAF	BRAF
BTG1	BTG1
BTK	BTK
BTLA	BTLA
.	CACNA1E
CBL	CBL
CBLB	CBLB
.	CBR1
.	CBR3
.	CD19
CD200	CD200
.	CD22
CD36	CD36
CD58	CD58
CDK6	CDK6
CDKN1B	CDKN1B
CDKN2A	CDKN2A
CDKN2B	CDKN2B
.	CDX2
.	CEP72
CHD2	CHD2
CHD4	CHD4
.	CPA2
CRADD	CRADD
CREBBP	CREBBP
CRLF2	CRLF2
CSF1R	CSF1R
CSF2RA	CSF2RA
CSF3R	CSF3R
CTCF	CTCF
.	DDX3X
DIS3	DIS3
DLEU1	DLEU1
DLEU2	DLEU2
DLEU7	DLEU7
DMD	DMD
DNMT3A	DNMT3A
.	DOT1L
EBF1	EBF1
ELF1	ELF1
EP300	EP300
EPOR	EPOR
ERG	ERG
ETV6	ETV6
EZH2	EZH2
FAT1	FAT1
FAT2	FAT2
FAT4	FAT4
FBXW7	FBXW7
FHIT	FHIT
FLNB	FLNB
FLT3	FLT3
.	FOCAD
FOXN3	FOXN3
GAB1	GAB1
.	HBS1L
.	ID3
IDH1	IDH1
IDH2	IDH2
IKZF1	IKZF1
IKZF2	IKZF2
IKZF3	IKZF3
IL7R	IL7R
INO80	INO80
JAK1	JAK1
JAK2	JAK2
JAK3	JAK3
JMJD1C	JMJD1C
KDM2B	KDM2B
KDM6A	KDM6A
KIT	KIT
KMT2A	KMT2A
KMT2C	KMT2C
KMT2D	KMT2D
KRAS	KRAS
LCOR	LCOR
LEF1	LEF1
LRRC8C	LRRC8C
LYN	LYN
MAP3K2	MAP3K2
MAX	MAX
MEF2C	MEF2C
MLH1	MLH1
MLLT3	MLLT3
MPL	MPL
MSH2	MSH2
MSH6	MSH6
MYC	MYC
NCL	NCL
NCOA6	NCOA6
NF1	NF1
NOTCH2	NOTCH2
NR3C1	NR3C1
NR3C2	NR3C2
NRAS	NRAS
NRIP1	NRIP1
NRXN1	NRXN1
NSD2	NSD2
NT5C2	NT5C2
NTRK3	.
.	NUDT15
NUP214	NUP214
P2RY8	P2RY8
PAN3	PAN3
PAX5	PAX5
.	PCM1
PDGFRA	PDGFRA
PDGFRB	PDGFRB
PIK3CA	PIK3CA
PRKCE	PRKCE
PRKCH	PRKCH
PRPS1	PRPS1
PTEN	PTEN
PTK2B	PTK2B
PTPN11	PTPN11
.	PTPN2
PTPRC	PTPRC
PTPRD	PTPRD
PVT1	PVT1
RAD21	RAD21
RAG1	RAG1
RAG2	RAG2
.	RAP1GDS1
RB1	RB1
RELN	RELN
.	RGS6
.	RIT1
RUNX1	RUNX1
RUNX2	RUNX2
SEMA7A	SEMA7A
SERP2	SERP2
SESN1	SESN1
SETBP1	SETBP1
SETD2	SETD2
SF1	SF1
SF3B1	SF3B1
SH2B3	SH2B3
SLX4IP	SLX4IP
SPRED1	SPRED1
STT3B	STT3B
SYK	SYK
TBL1XR1	TBL1XR1
TCF12	TCF12
.	TCF3
TCF4	TCF4
.	TENM4
TET1	TET1
TET2	TET2
TOX	TOX
TP53	TP53
.	TPMT
.	TYK2
.	U2AF1
.	ULK2
.	USP9X
VPREB1	VPREB1
WAC	WAC
.	ZCCHC7
ZEB2	ZEB2
.	ZFP36L2
ZNF384	ZNF384

## Sheet: TableS8
Supplementary Table 8. Single cell DNA amplicons for genotyping and LOH analyses
Location	Start	End	Amplicon_ID	Purpose	Gene	exon_or_refsnp
chr1	36936959	36937109	AMPL195678	LOH_analysis	CSF3R	rs3917980
chr1	115252122	115252259	AMPL117826	Genotyping	NRAS	exon4
chr1	115256317	115256536	AMPL112922	Genotyping	NRAS	exon3
chr1	115258533	115258748	AMPL113413	Genotyping	NRAS	exon2
chr1	165218571	165218792	AMPL195682	LOH_analysis	LMX1A	rs10753668
chr1	181705356	181705582	AMPL195683	Genotyping	CACNA1E	exon22
chr1	221912156	221912366	AMPL195684	LOH_analysis	DUSP10	rs1141714
chr2	25461867	25462081	AMPL195686	Genotyping	DNMT3A	exon22
chr2	25463058	25463271	AMPL187925	Genotyping	DNMT3A	exon19
chr2	25467191	25467419	AMPL195688	Genotyping	DNMT3A	exon15
chr2	32832448	32832607	AMPL187926	Genotyping	BIRC6	exon72
chr2	75113430	75113657	AMPL195690	LOH_analysis	HK2	rs2229626
chr2	209112897	209113122	AMPL112839	Genotyping	IDH1	exon4
chr2	213872177	213872405	AMPL195693	LOH_analysis	IKZF2	exon8
chr2	213914386	213914604	AMPL195694	LOH_analysis	IKZF2	exon5
chr2	213921396	213921623	AMPL195695	LOH_analysis	IKZF2	exon4
chr2	214012301	214012512	AMPL195696	LOH_analysis	IKZF2	exon3
chr3	13364662	13364890	AMPL159467	LOH_analysis	NUP210	rs514084
chr3	47058523	47058744	AMPL195698	Genotyping	SETD2	exon21
chr3	112066342	112066564	AMPL195699	LOH_analysis	CD200	rs1050572
chr3	112189984	112190195	AMPL195700	LOH_analysis	BTLA	exon3
chr3	179137060	179137274	AMPL159547	LOH_analysis	GNB4	rs1362650
chr4	5838289	5838513	AMPL159568	LOH_analysis	CRMP1	rs12331
chr4	39116697	39116911	AMPL147144	LOH_analysis	KLHL5	rs3733276
chr4	106155732	106155961	AMPL187930	Genotyping	TET2	exon3
chr4	106156711	106156939	AMPL195705	Genotyping	TET2	exon3
chr4	106157091	106157305	AMPL195706	Genotyping	TET2	exon3
chr4	106157962	106158187	AMPL195707	Genotyping	TET2	exon3
chr4	106164606	106164831	AMPL195708	Genotyping	TET2	exon6
chr4	126329404	126329626	AMPL195709	Genotyping	FAT4	exon4
chr4	126372651	126372875	AMPL195710	Genotyping	FAT4	exon9
chr4	149356297	149356517	AMPL195711	LOH_analysis	NR3C2	rs5525
chr4	187516663	187516880	AMPL159633	LOH_analysis	FAT1	rs1298865
chr5	1293917	1294132	AMPL195713	LOH_analysis	TERT	rs2736098
chr5	36143198	36143412	AMPL195714	LOH_analysis	LMBRD2	rs267766
chr5	142662032	142662260	AMPL195715	Genotyping	NR3C1	exon8
chr5	142779278	142779506	AMPL195716	Genotyping	NR3C1	exon2
chr5	158204203	158204426	AMPL140279	LOH_analysis	EBF1	rs1368298
chr5	176939171	176939380	AMPL195718	Genotyping	DDX41	exon15-16
chr5	176940163	176940384	AMPL195719	LOH_analysis	DDX41	rs335438
chr6	44081488	44081718	AMPL159800	LOH_analysis	MRPL14	rs6883
chr6	83075688	83075914	AMPL195721	LOH_analysis	TPBG	rs700494
chr6	157405708	157405934	AMPL147234	LOH_analysis	ARID1B	rs3734441
chr7	16822883	16823095	AMPL143121	LOH_analysis	TSPAN13	rs11491
chr7	50367109	50367321	AMPL195724	Genotyping	IKZF1	exon3
chr7	50454878	50455105	AMPL195726	Genotyping	IKZF1	exon6
chr7	50459257	50459487	AMPL195727	Genotyping	IKZF1	exon7
chr7	50467651	50467878	AMPL195728	Genotyping	IKZF1	exon8
chr7	50468051	50468274	AMPL195729	Genotyping	IKZF1	exon8
chr7	92734237	92734452	AMPL187940	LOH_analysis	SAMD9	rs6965201
chr7	140774254	140774467	AMPL195731	LOH_analysis	TMEM178B	rs477223
chr8	11406365	11406594	AMPL148091	LOH_analysis	BLK	rs3816668
chr8	27254900	27255128	AMPL195733	LOH_analysis	PTK2B	rs1045510
chr8	61178394	61178579	AMPL195734	LOH_analysis	CA8	rs7464181
chr8	128427968	128428191	AMPL195735	LOH_analysis	POU5F1B	rs1061393
chr9	5050579	5050723	AMPL195736	LOH_analysis	JAK2	rs2230722
chr9	5073543	5073770	AMPL113445	Genotyping	JAK2	exon14
chr9	20456501	20456711	AMPL195738	Genotyping	MLLT3	exon3
chr9	21994041	21994245	AMPL166848	Genotyping	CDKN2A	exon1
chr9	22008615	22008819	AMPL187945	Genotyping	CDKN2B	exon1
chr9	22447548	22447692	AMPL195741	LOH_analysis	DMRTA1	rs558612
chr9	36840383	36840611	AMPL195742	Genotyping	PAX5	exon10
chr9	36881876	36882080	AMPL113206	Genotyping	PAX5	exon8
chr9	37006296	37006508	AMPL195744	Genotyping	PAX5	exon4
chr9	37014943	37015165	AMPL195745	Genotyping	PAX5	exon3
chr9	133760810	133761003	AMPL113086	LOH_analysis	ABL1	rs1056171
chr9	134021408	134021630	AMPL195747	LOH_analysis	NUP214	rs2296710
chr10	5041172	5041398	AMPL195748	LOH_analysis	AKR1C2	rs3207909
chr10	21827579	21827796	AMPL195749	LOH_analysis	MLLT10	rs1802669
chr10	97990379	97990602	AMPL187948	LOH_analysis	BLNK	rs727852
chr10	104849264	104849468	AMPL159052	LOH_analysis	NT5C2	rs3740387
chr11	6340409	6340608	AMPL195752	LOH_analysis	CAVIN3	rs12570
chr11	34991606	34991770	AMPL195753	LOH_analysis	PDHX	rs497582
chr11	69462686	69462910	AMPL159183	LOH_analysis	CCND1	rs9344
chr11	130779795	130780015	AMPL195755	LOH_analysis	SNX19	rs1781
chr12	12037193	12037409	AMPL195756	Genotyping	ETV6	exon6
chr12	12038673	12038896	AMPL195757	Genotyping	ETV6	exon7
chr12	12870895	12871058	AMPL195758	Genotyping	CDKN1B	exon1
chr12	25378470	25378652	AMPL113245	Genotyping	KRAS	exon4
chr12	49445576	49445793	AMPL195760	Genotyping	KMT2D	exon10
chr12	112887992	112888210	AMPL137697	Genotyping	PTPN11	exon3
chr12	112893589	112893805	AMPL195762	Genotyping	PTPN11	exon6
chr12	112926035	112926252	AMPL195763	Genotyping	PTPN11	exon12
chr12	112926685	112926901	AMPL113268	Genotyping	PTPN11	exon13
chr13	28592415	28592642	AMPL113095	Genotyping	FLT3	exon20
chr13	28602123	28602340	AMPL195766	Genotyping	FLT3	exon16
chr13	28608254	28608473	AMPL195767	Genotyping	FLT3	exon13-14
chr13	48955353	48955538	AMPL195768	Genotyping	RB1	exon17
chr13	49026953	49027168	AMPL195769	Genotyping	RB1	exon18
chr13	49030266	49030482	AMPL195770	Genotyping	RB1	exon19
chr13	103339159	103339365	AMPL110672	LOH_analysis	METTL21C	rs660207
chr14	22038225	22038450	AMPL195772	LOH_analysis	OR10G3	rs11626669
chr14	75483604	75483819	AMPL195773	LOH_analysis	MLH3	rs13712
chr14	99642314	99642466	AMPL195774	LOH_analysis	BCL11B	rs1152783
chr15	25925977	25926204	AMPL134835	LOH_analysis	ATP10A	rs2076743
chr15	72190847	72191073	AMPL195776	LOH_analysis	MYO9A	rs2415128
chr15	90631724	90631934	AMPL137706	Genotyping	IDH2	exon4
chr16	3786483	3786710	AMPL166779	Genotyping	CREBBP	exon27
chr16	3817517	3817730	AMPL114905	Genotyping	CREBBP	exon16
chr16	28943680	28943900	AMPL195780	Genotyping	CD19	exon2
chr16	28944096	28944326	AMPL195781	Genotyping	CD19	exon3
chr16	58545215	58545445	AMPL195782	LOH_analysis	NDRG4	rs42945
chr16	84808603	84808825	AMPL195783	LOH_analysis	USP10	rs774298
chr16	89349504	89349725	AMPL195784	Genotyping	ANKRD11	exon10
chr17	2606507	2606737	AMPL134912	LOH_analysis	CLUH	rs1065479
chr17	7565185	7565328	AMPL187968	Genotyping	upstream TP53
chr17	7576657	7576882	AMPL195787	Genotyping	TP53	exon9
chr17	7577359	7577586	AMPL195789	Genotyping	TP53	exon7
chr17	7578058	7578281	AMPL195790	Genotyping	TP53	exon6
chr17	7578352	7578556	AMPL55074	Genotyping	TP53	exon5
chr17	7579258	7579485	AMPL195792	Genotyping	TP53	exon4
chr17	29485926	29486098	AMPL187975	Genotyping	NF1	exon3
chr17	29645806	29646032	AMPL195795	LOH_analysis	NF1	rs1129506
chr17	29663549	29663766	AMPL187976	Genotyping	NF1	exon41
chr17	29687453	29687653	AMPL187977	Genotyping	NF1	exon56
chr17	37922033	37922259	AMPL167402	LOH_analysis	IKZF3	rs907092
chr18	7011188	7011413	AMPL195799	LOH_analysis	LAMA1	rs619106
chr18	12801898	12802099	AMPL195800	Genotyping	PTPN2	exon8
chr18	12858972	12859188	AMPL195801	Genotyping	PTPN2	exon2
chr18	52895375	52895531	AMPL187979	LOH_analysis	TCF4	rs8766
chr18	67365466	67365668	AMPL134944	LOH_analysis	DOK6	rs4426448
chr19	17954966	17955160	AMPL158646	LOH_analysis	JAK3	rs916018
chr19	33106533	33106676	AMPL158663	LOH_analysis	ANKRD27	rs405858
chr19	55511958	55512137	AMPL158731	LOH_analysis	NLRP2	rs12768
chr20	6099909	6100100	AMPL134948	LOH_analysis	FERMT1	rs10373
chr20	10579215	10579387	AMPL187981	Genotyping	SLX4IP	exon5
chr20	19634510	19634732	AMPL161567	LOH_analysis	SLC24A3	rs3790278
chr20	31024049	31024274	AMPL158765	LOH_analysis	ASXL1	rs4911231
chr20	57478583	57478807	AMPL195811	LOH_analysis	GNAS	rs7121
chr21	39755450	39755677	AMPL195812	Genotyping	ERG	exon10
chr21	46951351	46951556	AMPL160153	LOH_analysis	SLC19A1	rs12659
chr22	22599235	22599447	AMPL195814	Genotyping	VPREB1	exon2
chr22	24085902	24086132	AMPL160163	LOH_analysis	ZNF70	rs5759985
chr22	45767242	45767455	AMPL195816	LOH_analysis	SMC1B	rs136569
chrX	47058228	47058453	AMPL195817	Genotyping	UBA1	exon2

## Sheet: TableS9
Supplementary Table 9. Single cell DNA amplicons for B-ALL clono-specific IG/TR detection
Patient	IG/TR_rearrangement	Amplicon	Amplification_status
EI_035	>IGHD2-15*01 2/AGC/4 IGHJ5*02	CO303_AMP1	Fail
EI_047	>IGHD5-5*01 3/AA/29 IGHJ4*01	CO303_AMP2	Fail
EI_047	>IGKV2D-30*01 1/G/5 KDE	CO303_AMP3	Pass
EI_035	>TRDD2*01 0/GTT/0 TRDD3*01	CO303_AMP4	Pass

## Sheet: TableS10
Supplementary Table 10. ADT-seq panel and spike-in antibodies
Data from TotalSeq_D_Human_Heme_Oncology_Cocktail_V01_Barcode.xlsx file (Biolegend)
Format / Barcode	Specificity	Clone	Barcode sequence	Ensembl ID	Gene Name
D0028	anti-human CD30	BY88	TCAGGGTGTGCTGTA	ENSG00000120949	TNFRSF8 (CD30)
D0034	anti-human CD3	UCHT1	CTCATTGTAACTCCT	ENSG00000167286	CD3D
D0046	anti-human CD8	SK1	GCGCAACTTGATGAT	ENSG00000153563	CD8A
D0047	anti-human CD56	5.1H11	TCCTTTCCTGATAGG	ENSG00000149294	NCAM1
D0048	anti-human CD45	2D1	TCCCTTGCGATTTAC	ENSG00000081237	PTPRC
D0050	anti-human CD19	HIB19	CTGGGCAATTACTCG	ENSG00000177455	CD19
D0052	anti-human CD33	P67.6	TAACTCAGGGCCTAT	ENSG00000105383	CD33
D0053	anti-human CD11c	S-HCL-3	TACGCCTATAACTTG	ENSG00000140678	ITGAX
D0054	anti-human CD34	581	GCAGAAATCTCCCTT	ENSG00000174059	CD334
D0055	anti-human CD138 (Syndecan-1)	MI15	ACTCTTTCGTTTACG	ENSG00000115884	SDC1
D0060	anti-human CD90 (Thy1)	5e10	GCATTGTACGATTCA	ENSG00000154096	THY1
D0061	anti-human CD117 (c-kit)	104D2	AGACTAATAGCTGAC	ENSG00000157404	KIT
D0062	anti-human CD10	HI10a	CAGCCATTCATTAGG	ENSG00000196549	MME (CD10)
D0063	anti-human CD45RA	HI100	TCAATCCTTCCGCTT	ENSG00000081237	PTPRC
D0064	anti-human CD123	6H6	CTTCACTCTGTCAGG	ENSG00000185291	IL3RA
D0066	anti-human CD7	CD7-6B7	TGGATTCCCGGACTT	ENSG00000173762	CD7
D0072	anti-human CD4	RPA-T4	TGTTCCCGCTCAACT	ENSG00000010610	CD4
D0073	anti-human CD44	IM7	TGGCTTCAGGTCCTA	ENSG00000026508	CD44
D0081	anti-human CD14	M5E2	TCTCAGACCTCCGTA	ENSG00000170458	CD14
D0083	anti-human CD16	3G8	AAGTTCACTCTTTGC	ENSG00000203747	FCGR3A
D0085	anti-human CD25	BC96	TTTGTCCTGTACGCC	ENSG00000134460	IL2RA
D0087	anti-human CD45RO	UCHL1	CTCCGAATCATGTTG	ENSG00000081237	PTPRC
D0090	Mouse IgG1, κ	MOPC-21	GCCGGACGACATTAA
D0091	Mouse IgG2a, κ	MOPC-173	CTCCTACCTAAACTG
D0092	Mouse IgG2b, κ	MPC-11	ATATGTATCACGCGA
D0138	anti-human CD5	UCHT2	CATTAACGGGATGCC	ENSG00000110448	CD5
D0146	anti-human CD69	FN50	GTCTCTTGGCTTAAA	ENSG00000110848	CD69
D0147	anti-human CD62L	DREG-56	GTCCCTGCAACTTGA	ENSG00000188404	SELL
D0159	anti-human HLA-DR	L243	AATAGCGAGCAAGTA	ENSG00000204287	HLA-DRA
D0160	anti-human CD1c	L161	GAGCTACTTCACTCG	ENSG00000158481	CD1C
D0161	anti-human CD11b	ICRF44	GACAAGTGATCTGCA	ENSG00000169896	ITGAM
D0162	anti-human CD64	10.1	AAGTATGCCCTACGA	ENSG00000150337	FCGR1A
D0163	anti-human CD141 (Thrombomodulin)	M80	GGATAACCGCGCTTT	ENSG00000178726	THBD
D0218	anti-human CD62P (P-Selectin)	AK4	CCTTCCGTATCCCTT	ENSG00000174175	SELP
D0352	anti-human Fc?RI?	AER-37 (CRA-1)	CTCGTTTCCGTATCG	ENSG00000179639	FCER1A
D0358	anti-human CD163	GHI/61	GCTTCTCCTTCCTTA	ENSG00000177575	CD163
D0359	anti-human CD83	HB15e	CCACTCATTTCCGGT	ENSG00000112149	CD83
D0364	anti-human CD13	WM15	TTTCAACGCCCTTTC	ENSG00000166825	ANPEP
D0367	anti-human CD2	TS1/8	TACGATTTGTCAGGG	ENSG00000116824	CD2
D0370	anti-human CD303 (BDCA-2)	201A	GAGATGTCCGAATTT	ENSG00000198178	CLEC4C
D0389	anti-human CD38	HIT2	TGTACCCGCTTGTGA	ENSG00000004468	CD38
D0393	anti-human CD22	S-HCL-1	GGGTTGTTGTCTTTG	ENSG00000012124	CD22
D0394	anti-human CD71	CY1G4	CCGTGTTCCTCATTA	ENSG00000072274	TFRC
D0406	anti-human CD304 (Neuropilin-1)	12C2	GGACTAAGTTTCGTT	ENSG00000099250	NRP1
D0576	anti-human CD49d	9F10	CCATTCAACTTCCGG	ENSG00000115232	ITGA4
Spike-in antibody
Format / Barcode	Specificity	Clone	Barcode sequence	Ensembl ID	Gene Name
D0574	anti-human CD235a (Glycophorin A)	HI264	AGAGTATGTATGGGA	ENSG00000170180	GYPA

[truncated: 1 more sheets: TableS11]
